# Supplementary material for: A luminescence-based protocol for assessing fructose metabolism via quantification of ketohexokinase enzymatic activity in mouse or human hepatocytes
Source: PubMed Central journal article supplement — STAR Protoc. 2021 Aug 9;2(3):100731. doi: 10.1016/j.xpro.2021.100731 (PMC8361265; doi:10.1016/j.xpro.2021.100731), 2021-08-09

Figure S1. 3-O-Methyl-Fructose NMR spectra, related to Step 3

| Parameter                 | Value               |
|---------------------------|---------------------|
| 1 Data File Name          | 3-O-Me-fructose     |
| 2 Title                   | C556618.1.fid       |
| 3 Comment                 | C556618             |
| 4 Origin                  | Bruker BioSpin GmbH |
| 5 Owner                   | sdcard01-008        |
| 6 Site                    |                     |
| 7 Spectrometer            | Avance Neo nanobay  |
| 8 Author                  |                     |
| 9 Solvent                 | DMSO                |
| 10 Temperature            | 298.2               |
| 11 Pulse Sequence         | zg30                |
| 12 Number of Scans        | 16                  |
| 13 Receiver Gain          | 101                 |
| 14 Relaxation Delay       | 2.0000              |
| 15 Pulse Width            | 8.0000              |
| 16 Acquisition Time       | 1.9988              |
| 17 Acquisition Date       | 2020-10-21T13:43:56 |
| 18 Modification Date      | 2020-10-21T17:13:56 |
| 19 Spectrometer Frequency | 400.30              |
| 20 Spectral Width         | 8196.7              |
| 21 Lowest Frequency       | -1626.5             |
| 22 Nucleus                | <sup>1</sup> H      |
| 23 Acquired Size          | 16384               |
| 24 Spectral Size          | 65536               |

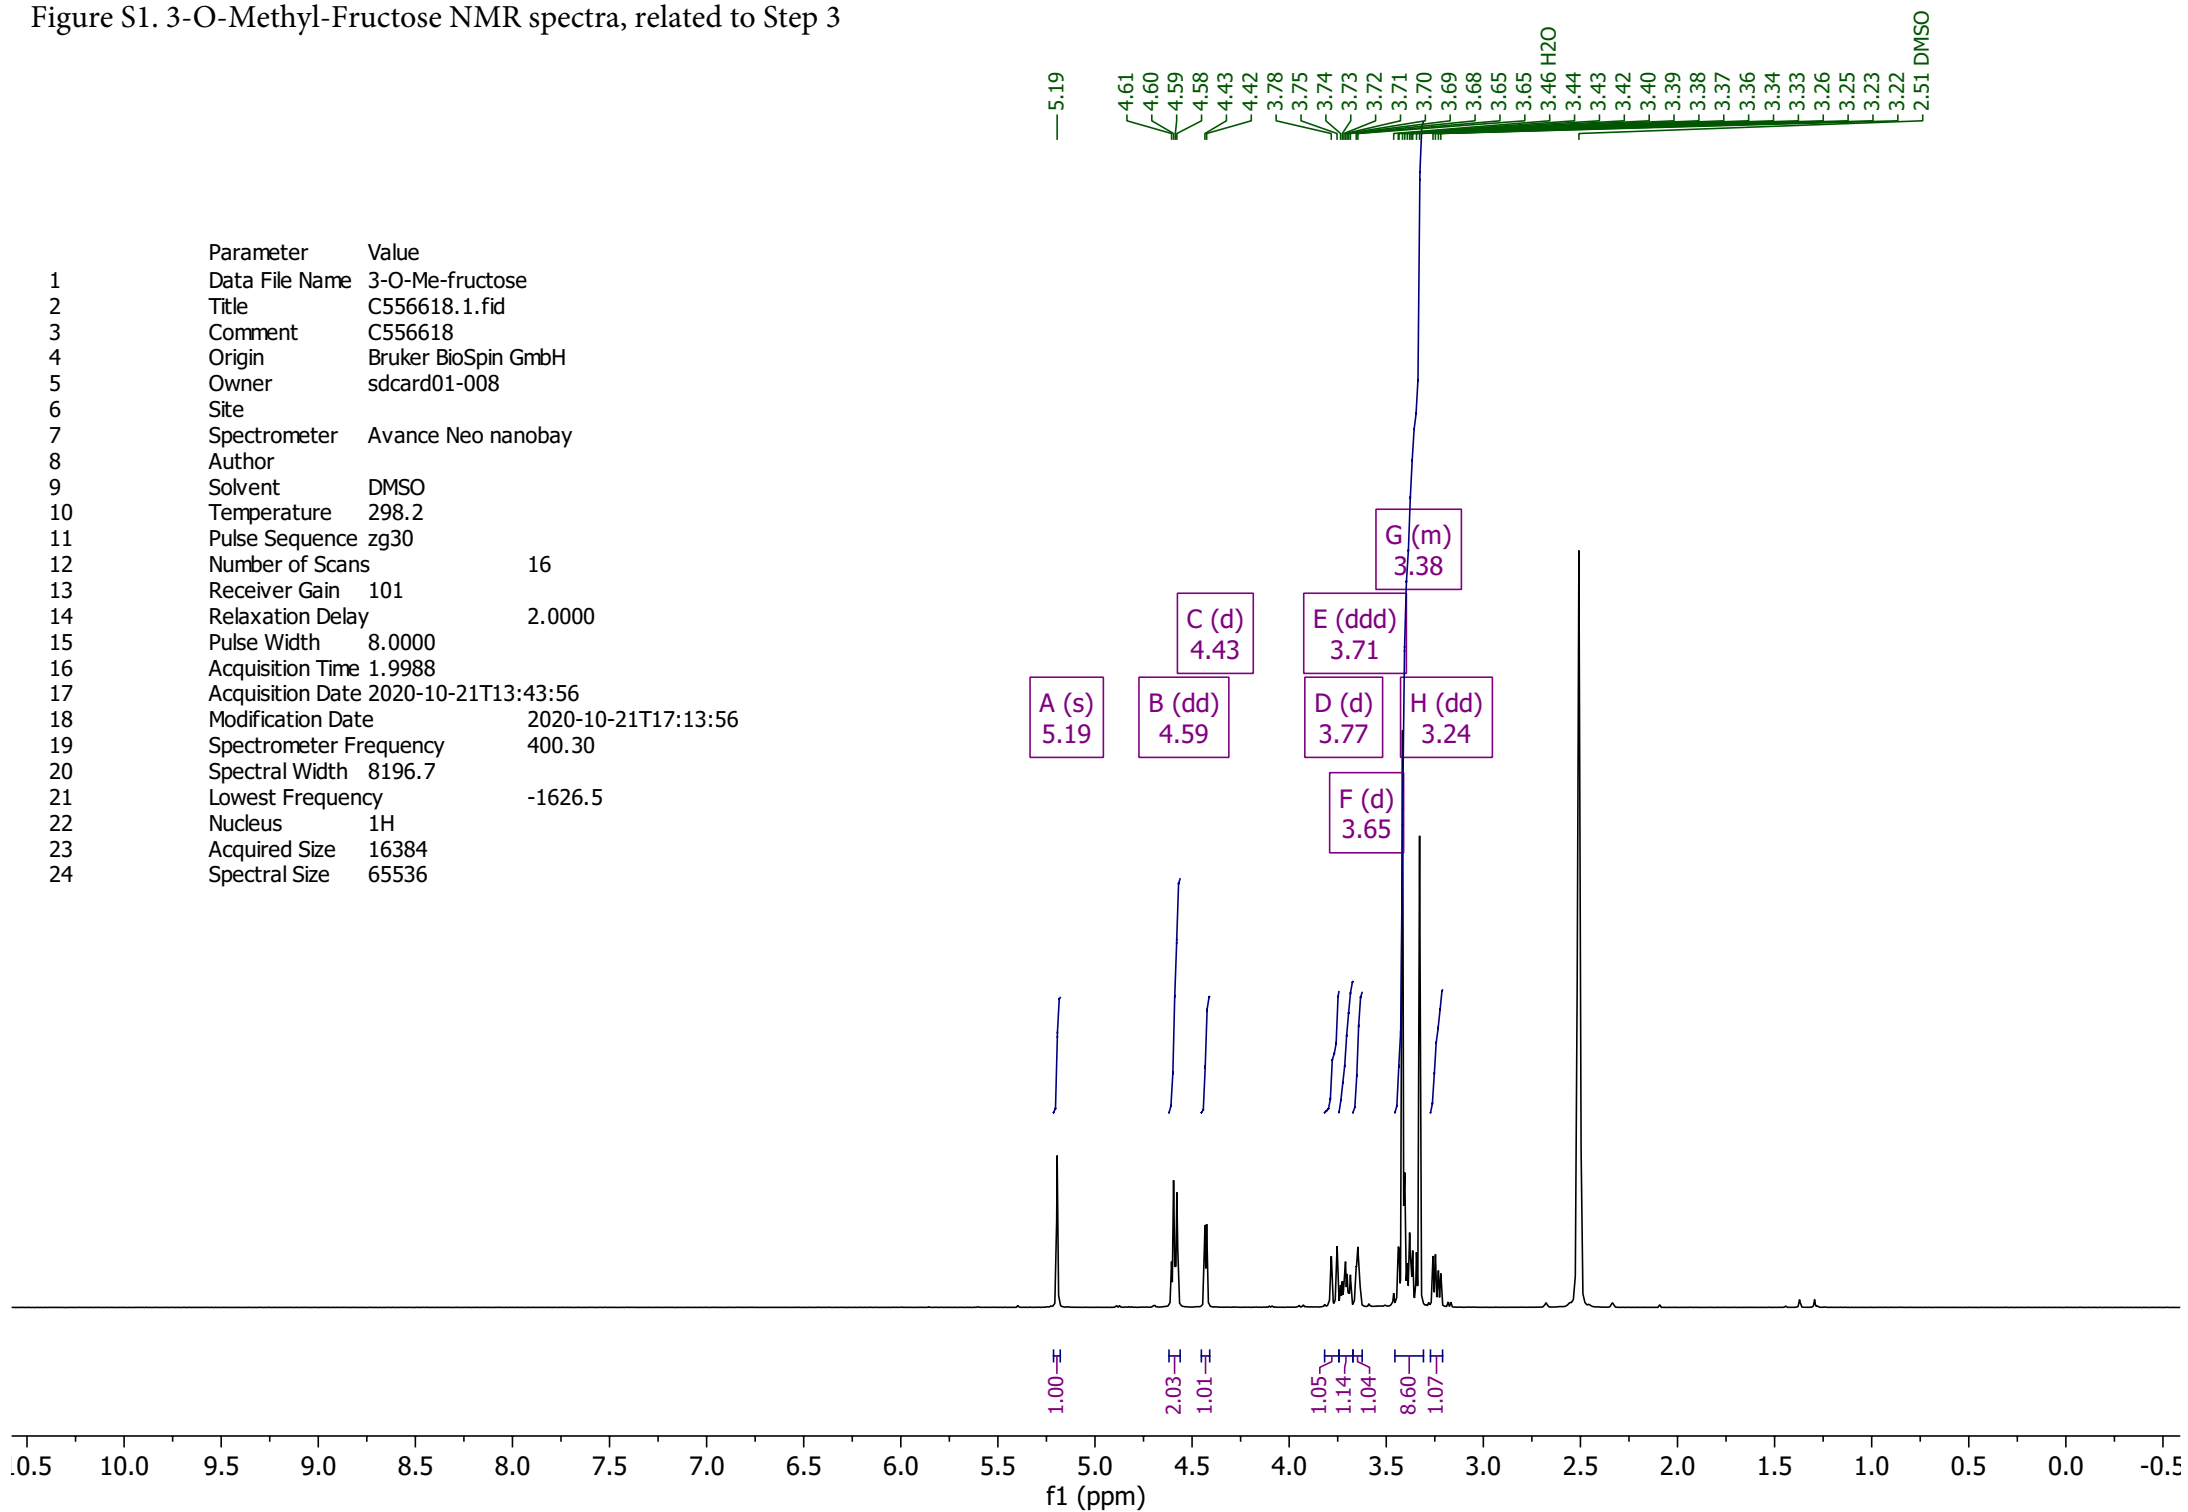

Supplement: mmc1.pdf [file mmc1.pdf]
